# Supplementary material for: Development of a Community Commitment Scale with Cross-sectional Survey Validation for Preventing Social Isolation in Older Japanese People
Source: PubMed Central journal article supplement (PMC3533914; doi:10.1186/1471-2458-12-903), 2012-10-24
Supplement: 1471-2458-12-903-S2.pdf [file 1471-2458-12-903-S2.pdf]

## Appendix: Table5. Community Commitment Scale Japanese version

### 地域コミットメント尺度 日本語版

あなたの「地域での人付き合いや活動」に対するお考えを伺います。

各項目についてあなたの考えに最も近いと思う番号に○を1つつけて下さい。

|                                        | 全く<br>思わない | あまり<br>思わない | やや<br>そう思う | とても<br>そう思う |
|----------------------------------------|------------|-------------|------------|-------------|
| つきあい                                   |            |             |            |             |
| 1. この地域の人々は日頃から互いに気づかったり、<br>声をかけ合っている | 0          | 1           | 2          | 3           |
| 2. この地域の人々は困った時は助けてくれる                 | 0          | 1           | 2          | 3           |
| 3. 地域の人たちと過ごす時間は楽しい                    | 0          | 1           | 2          | 3           |
| 4. この地域の人々はよくあいさつをしている                 | 0          | 1           | 2          | 3           |
| 帰属感                                    |            |             |            |             |
| 5. 地域での人づきあいはわずらわしい                    | 0          | 1           | 2          | 3           |
| 6. 地域の人のことについては関心がない                   | 0          | 1           | 2          | 3           |
| 7. 町内会(自治会)などに行くと役割が増えそうで気が重い          | 0          | 1           | 2          | 3           |
| 8. 私はこの地域の一員とは感じられない                   | 0          | 1           | 2          | 3           |
